# Supplementary material for: Genomic Landscape, Clinical Features and Outcomes of Non-Small Cell Lung Cancer Patients Harboring BRAF Alterations of Distinct Functional Classes
Source: MDPI journal article supplement (doi:10.3390/cancers14143472), 2022-07-17
Supplement: s1 [file s1]

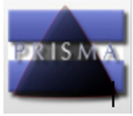

## PRISMA 2009 Flow Diagram

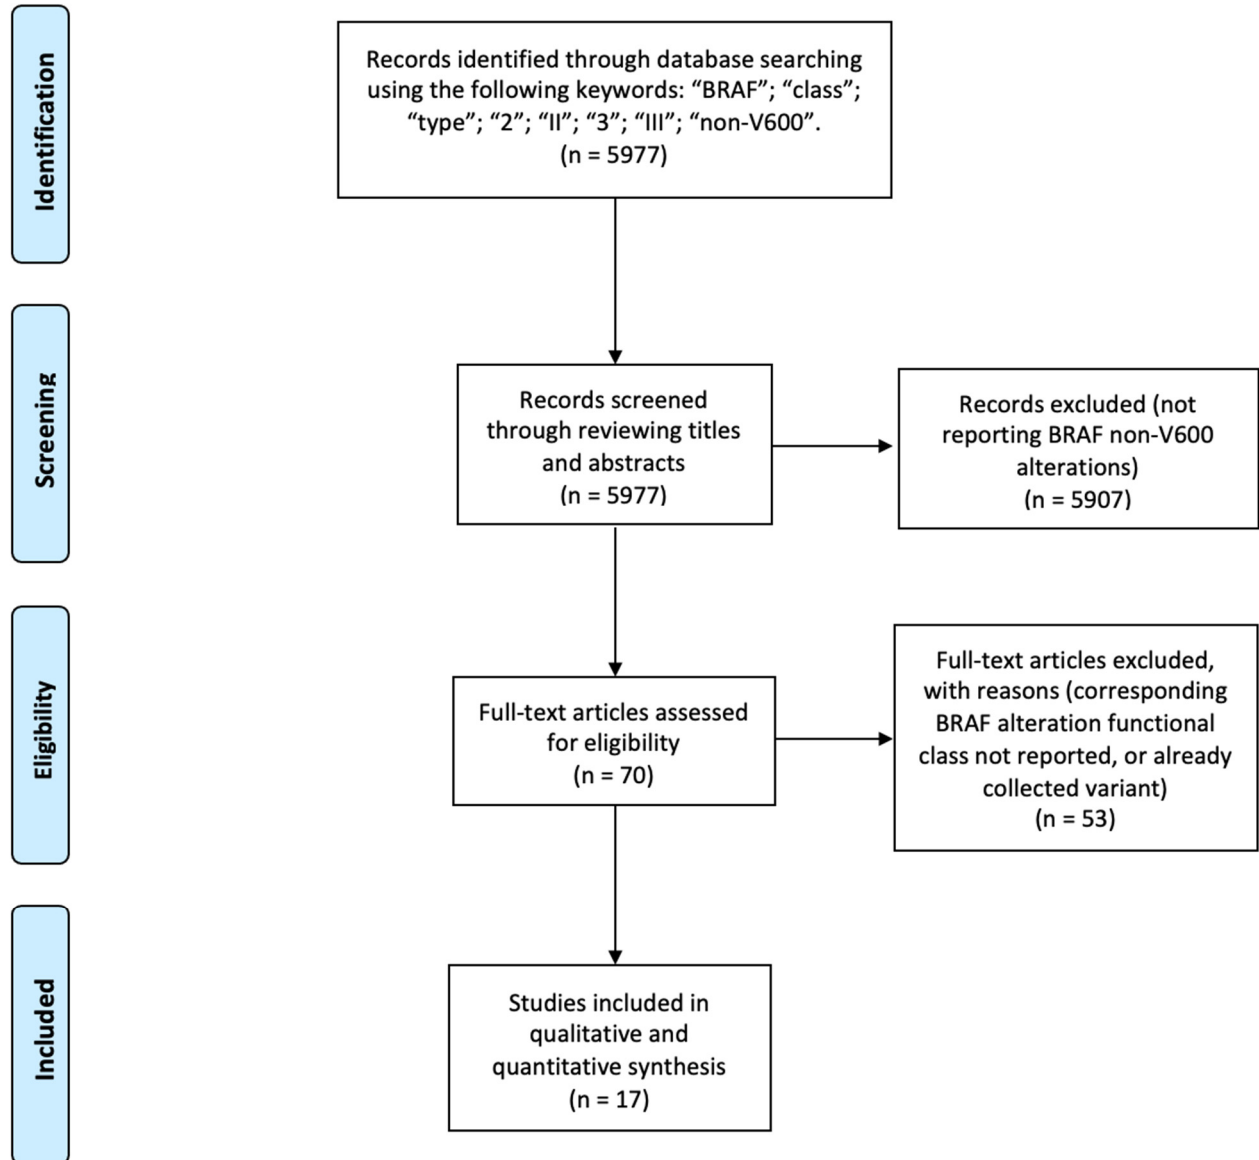

**Figure S1.** Preferred Reported Items for Systematic Reviews and Meta-Analysis (PRISMA) flowchart of literature research adopted to conduct the systematic review.

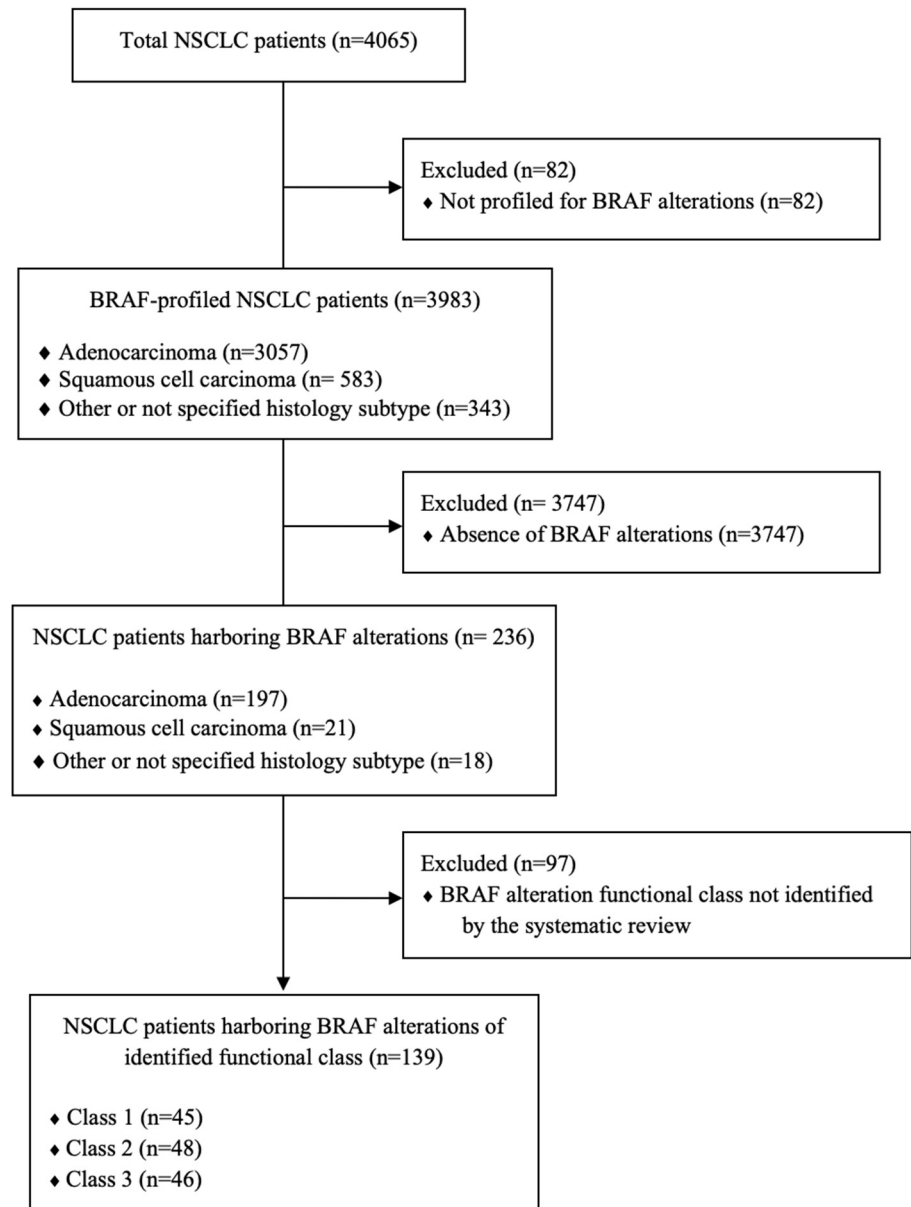

**Figure S2.** Consort Diagram summarizing the selection of NSCLC patients harboring BRAF alterations of defined functional class in the cBioPortal.

**Table S1.** List of BRAF alterations (protein change) and corresponding functional class detected through the systematic review of the literature.

| Class 2               | Class 3 |
|-----------------------|---------|
| A598V                 | D287H   |
| A712T                 | D287Y   |
| A727V                 | D594A   |
| E451Q                 | D594E   |
| E586K                 | D594G   |
| Fusions               | D594H   |
| G464A                 | D594N   |
| G464E                 | D594V   |
| G464R                 | D594Y   |
| G464V                 | F247L   |
| G469A                 | F595L   |
| G469L                 | G466A   |
| G469R                 | G466E   |
| G469S                 | G466R   |
| G469V                 | G466V   |
| I463S                 | G469E   |
| K499E                 | G569R   |
| K601E                 | G596A   |
| K601N                 | G596C   |
| K601Q                 | G596D   |
| K601T                 | G596R   |
| L485_P490delinsY      | K483E   |
| L485F                 | K483M   |
| L505F                 | N581I   |
| L505H                 | N581K   |
| L525R                 | N581S   |
| L597Q                 | N581T   |
| L597R                 | N581Y   |
| L597S                 | Q524L   |
| L597V                 | R558Q   |
| N486_P490del          | S467A   |
| Q257R                 | S467E   |
| R462I                 | S467L   |
| T599_V600TinsT        | T599A   |
| T599dup               | V459L   |
| T599I                 |         |
| T599R                 |         |
| V471F                 |         |
| V487_P492delinsA      |         |
| V600_K601delinsE      |         |
| V600_K601delinsEN     |         |
| V600_S605delinsEISRWR |         |

**Table S2.** Comparative frequency of concurrent gene alterations in most commonly altered and key genes among NSCLC patients harboring BRAF class 1, class 2, and class 3 alterations. RAS includes alterations of HRAS, NRAS, and KRAS genes. DDR includes alterations in BRCA1, BRCA2, PARP1, PARP2, ERCC1, MLH1, MSH3, MSH2, MSH6, PMS2, ATM, CHEK2, SLFN11, ATR, CHEK1, WEE1, FANCD2, RAD51, AURKA, PALB2, and TP53 genes. NSCLC: non-small cell lung cancer; DDR: DNA damage response and repair genes.

| <b>Gene</b> | <b>Class 1,<br/>%</b> | <b>Class 2,<br/>%</b> | <b>Class 3,<br/>%</b> | <b><i>p</i> value for<br/>group differences</b> | <b><i>p</i> value<br/>class 1 vs<br/>class 2</b> | <b><i>p</i> value<br/>class 1 vs<br/>class 3</b> | <b><i>p</i> value<br/>class 2 vs<br/>class 3</b> | <b>Enriched<br/>class</b> |
|-------------|-----------------------|-----------------------|-----------------------|-------------------------------------------------|--------------------------------------------------|--------------------------------------------------|--------------------------------------------------|---------------------------|
| SETD2       | 44                    | 2                     | 7                     | 0,000000043                                     | 0,000017                                         | 0,00018                                          | 0,60918                                          | 1                         |
| STK11       | 0                     | 21                    | 33                    | 0,000225                                        | 0,00732                                          | 0,00028                                          | 0,2899                                           | 3                         |
| POM121L12   | 0                     | 0                     | 35                    | 0,001                                           | -                                                | 0,037                                            | 0,037                                            | 3                         |
| TERT        | 0                     | 26                    | 17                    | 0,002                                           | 0,0026                                           | 0,0210                                           | 0,482                                            | 2                         |
| MUC16       | 13                    | 33                    | 70                    | 0,002                                           | 0,3539                                           | 0,0084                                           | 0,1060                                           | 3                         |
| OVCH1       | 7                     | 44                    | 5                     | 0,003                                           | 0,084                                            | 1                                                | 0,040                                            | 2                         |
| ZFHX4       | 13                    | 28                    | 65                    | 0,004                                           | 0,560                                            | 0,020                                            | 0,098                                            | 3                         |
| ITGA4       | 0                     | 0                     | 30                    | 0,004                                           | -                                                | 0,074                                            | 0,074                                            | 3                         |
| KEAP1       | 2                     | 22                    | 26                    | 0,005                                           | 0,0226                                           | 0,0094                                           | 0,8069                                           | 3                         |
| RAS         | 0                     | 21                    | 13                    | 0,006                                           | 0,0098                                           | 0,0743                                           | 0,437                                            | 2                         |
| XIRP2       | 7                     | 17                    | 50                    | 0,008                                           | 0,733                                            | 0,054                                            | 0,137                                            | 3                         |
| CREBBP      | 2                     | 12                    | 0                     | 0,012                                           | 0,28                                             | 0,99                                             | 0,12                                             | 2                         |
| KRAS        | 0                     | 15                    | 4                     | 0,013                                           | 0,069                                            | 0,484                                            | 0,364                                            | 2                         |
| CTNNA2      | 0                     | 39                    | 15                    | 0,015                                           | 0,065                                            | 0,387                                            | 0,387                                            | 2                         |
| GRIA3       | 0                     | 22                    | 0                     | 0,015                                           | 0,18                                             | -                                                | 0,18                                             | 2                         |
| TFAP2D      | 7                     | 0                     | 30                    | 0,016                                           | 0,93                                             | 0,40                                             | 0,11                                             | 3                         |
| GRM8        | 7                     | 0                     | 30                    | 0,016                                           | 0,93                                             | 0,40                                             | 0,11                                             | 3                         |
| JAKMIP2     | 0                     | 6                     | 30                    | 0,017                                           | 1                                                | 0,18                                             | 0,26                                             | 3                         |
| KLHL41      | 20                    | 0                     | 0                     | 0,018                                           | 0,28                                             | 0,28                                             | -                                                | 1                         |
| UMODL1      | 20                    | 0                     | 0                     | 0,018                                           | 0,28                                             | 0,28                                             | -                                                | 1                         |
| DNAH5       | 0                     | 33                    | 40                    | 0,021                                           | 0,087                                            | 0,052                                            | 0,929                                            | 3                         |
| ABCA13      | 7                     | 17                    | 45                    | 0,021                                           | 0,73                                             | 0,11                                             | 0,25                                             | 3                         |
| TP53        | 38                    | 58                    | 65                    | 0,024                                           | 0,152                                            | 0,048                                            | 0,635                                            | 3                         |
| PKHD1L1     | 7                     | 6                     | 35                    | 0,025                                           | 1                                                | 0,23                                             | 0,20                                             | 3                         |
| CNTNAP2     | 7                     | 11                    | 40                    | 0,026                                           | 1                                                | 0,2                                              | 0,2                                              | 3                         |
| SDHA        | 0                     | 15                    | 9                     | 0,028                                           | 0,059                                            | 0,261                                            | 0,520                                            | 2                         |
| PTPRD       | 4                     | 19                    | 24                    | 0,03                                            | 0,128                                            | 0,056                                            | 0,759                                            | 3                         |
| FSTL5       | 0                     | 17                    | 35                    | 0,031                                           | 0,587                                            | 0,098                                            | 0,587                                            | 3                         |
| FYB1        | 0                     | 17                    | 35                    | 0,031                                           | 0,587                                            | 0,098                                            | 0,587                                            | 3                         |
| CSMD1       | 0                     | 33                    | 35                    | 0,033                                           | 0,098                                            | 0,098                                            | 1                                                | 3                         |
| FAT1        | 2                     | 20                    | 15                    | 0,033                                           | 0,063                                            | 0,138                                            | 0,783                                            | 2                         |
| FLG2        | 0                     | 33                    | 15                    | 0,038                                           | 0,13                                             | 0,68                                             | 0,68                                             | 2                         |
| HRNR        | 0                     | 33                    | 15                    | 0,038                                           | 0,13                                             | 0,68                                             | 0,68                                             | 2                         |
| AHNAK2      | 20                    | 6                     | 40                    | 0,039                                           | 0,74                                             | 0,74                                             | 0,10                                             | 3                         |
| CPLANE1     | 0                     | 22                    | 35                    | 0,04                                            | 0,316                                            | 0,098                                            | 0,611                                            | 3                         |
| FBXL7       | 0                     | 22                    | 35                    | 0,04                                            | 0,316                                            | 0,098                                            | 0,611                                            | 3                         |
| FGFR1/2/3/4 | 0                     | 13                    | 13                    | 0,042                                           | 0,11                                             | 0,11                                             | 1                                                | 2,3                       |
| RYR2        | 13                    | 39                    | 55                    | 0,042                                           | 0,42                                             | 0,09                                             | 0,50                                             | 3                         |
| SI          | 0                     | 11                    | 30                    | 0,042                                           | 0,61                                             | 0,18                                             | 0,61                                             | 3                         |
| IL1RAPL1    | 0                     | 11                    | 30                    | 0,042                                           | 0,61                                             | 0,18                                             | 0,61                                             | 3                         |
| CDH10       | 7                     | 44                    | 40                    | 0,043                                           | 0,13                                             | 0,13                                             | 1                                                | 2                         |
| ADAMTS16    | 0                     | 33                    | 30                    | 0,045                                           | 0,13                                             | 0,13                                             | 1                                                | 2                         |

|                  |           |           |           |              |      |      |      |          |
|------------------|-----------|-----------|-----------|--------------|------|------|------|----------|
| <b>ARAP2</b>     | <b>0</b>  | <b>17</b> | <b>0</b>  | <b>0,045</b> | 0,39 | -    | 0,39 | <b>2</b> |
| <b>ALK</b>       | <b>0</b>  | <b>0</b>  | <b>7</b>  | <b>0,047</b> | 1    | 0,47 | 0,47 | <b>3</b> |
| <b>DDR genes</b> | <b>49</b> | <b>69</b> | <b>72</b> | <b>0,049</b> | 0,17 | 0,13 | 0,93 | <b>3</b> |
| <b>COL11A1</b>   | <b>7</b>  | <b>17</b> | <b>40</b> | <b>0,05</b>  | 0,73 | 0,20 | 0,44 | <b>3</b> |
| BRCA1/2          | 2         | 17        | 9         | 0,051        | -    | -    | -    | 2        |
| MUC2             | 0         | 33        | 20        | 0,051        | -    | -    | -    | 2        |
| HCN1             | 0         | 33        | 20        | 0,051        | -    | -    | -    | 2        |
| CDH6             | 0         | 33        | 20        | 0,051        | -    | -    | -    | 2        |
| TTN              | 20        | 50        | 60        | 0,056        | -    | -    | -    | 3        |
| MET              | 0         | 4         | 11        | 0,057        | -    | -    | -    | 3        |
| PTPRT            | 2         | 17        | 11        | 0,057        | -    | -    | -    | 2        |
| ROS1             | 0         | 11        | 4         | 0,06         | -    | -    | -    | 2        |
| MMP16            | 7         | 11        | 35        | 0,062        | -    | -    | -    | 3        |
| C6               | 0         | 28        | 30        | 0,064        | -    | -    | -    | 3        |
| HOXB6            | 13        | 0         | 0         | 0,072        | -    | -    | -    | 1        |
| CNTNAP1          | 13        | 0         | 0         | 0,072        | -    | -    | -    | 1        |
| HLA-DQB1         | 13        | 0         | 0         | 0,072        | -    | -    | -    | 1        |
| CCL5             | 13        | 0         | 0         | 0,072        | -    | -    | -    | 1        |
| PEX12            | 13        | 0         | 0         | 0,072        | -    | -    | -    | 1        |
| HEATR9           | 13        | 0         | 0         | 0,072        | -    | -    | -    | 1        |
| SNORD7           | 13        | 0         | 0         | 0,072        | -    | -    | -    | 1        |
| AP2B1            | 13        | 0         | 0         | 0,072        | -    | -    | -    | 1        |
| TAF15            | 13        | 0         | 0         | 0,072        | -    | -    | -    | 1        |
| RGPD4            | 13        | 0         | 25        | 0,076        | -    | -    | -    | 3        |
| RSF1             | 20        | 0         | 5         | 0,083        | -    | -    | -    | 1        |
| ERICH3           | 0         | 28        | 25        | 0,086        | -    | -    | -    | 2        |
| SLC1A3           | 0         | 28        | 25        | 0,086        | -    | -    | -    | 2        |
| NTRK1/2/3        | 4         | 19        | 11        | 0,087        | -    | -    | -    | 2        |
| SMARCA4          | 4         | 4         | 15        | 0,089        | -    | -    | -    | 3        |
| COL3A1           | 0         | 11        | 25        | 0,092        | -    | -    | -    | 3        |
| SDK1             | 0         | 11        | 25        | 0,092        | -    | -    | -    | 3        |
| NF1              | 2         | 15        | 13        | 0,096        | -    | -    | -    | 2        |
| TRIO             | 0         | 28        | 20        | 0,096        | -    | -    | -    | 2        |
| CDH12            | 7         | 17        | 35        | 0,107        | -    | -    | -    | 3        |
| EGFR             | 7         | 21        | 11        | 0,111        | -    | -    | -    | 2        |
| LRP1B            | 13        | 26        | 45        | 0,118        | -    | -    | -    | 3        |
| LRFN5            | 0         | 17        | 25        | 0,12         | -    | -    | -    | 3        |
| C7               | 0         | 17        | 25        | 0,12         | -    | -    | -    | 3        |
| WDR70            | 0         | 17        | 25        | 0,12         | -    | -    | -    | 3        |
| LRP2             | 0         | 17        | 25        | 0,12         | -    | -    | -    | 3        |
| NUP155           | 0         | 17        | 25        | 0,12         | -    | -    | -    | 3        |
| GDNF             | 0         | 17        | 25        | 0,12         | -    | -    | -    | 3        |
| MUC17            | 13        | 17        | 40        | 0,122        | -    | -    | -    | 3        |
| ZNF804A          | 13        | 17        | 40        | 0,122        | -    | -    | -    | 3        |
| DNAH3            | 20        | 17        | 0         | 0,123        | -    | -    | -    | 1        |
| PXDNL            | 13        | 28        | 45        | 0,125        | -    | -    | -    | 3        |
| LAMB4            | 0         | 22        | 10        | 0,13         | -    | -    | -    | 2        |
| AFF2             | 7         | 11        | 30        | 0,137        | -    | -    | -    | 3        |
| FSIP2            | 7         | 11        | 30        | 0,137        | -    | -    | -    | 3        |
| MROH2B           | 7         | 28        | 35        | 0,144        | -    | -    | -    | 3        |
| HMGCS1           | 0         | 22        | 20        | 0,153        | -    | -    | -    | 2        |

|              |    |    |    |       |   |   |   |   |
|--------------|----|----|----|-------|---|---|---|---|
| PKHD1        | 0  | 22 | 20 | 0,153 | - | - | - | 2 |
| DNAJC21      | 0  | 22 | 20 | 0,153 | - | - | - | 2 |
| UGT3A1       | 0  | 22 | 20 | 0,153 | - | - | - | 2 |
| NRXN1        | 0  | 22 | 15 | 0,164 | - | - | - | 2 |
| AGXT2        | 0  | 22 | 15 | 0,164 | - | - | - | 2 |
| PRKAA1       | 0  | 22 | 15 | 0,164 | - | - | - | 2 |
| TMEM267      | 0  | 22 | 15 | 0,164 | - | - | - | 2 |
| C5ORF34      | 0  | 22 | 15 | 0,164 | - | - | - | 2 |
| CARD6        | 0  | 22 | 15 | 0,164 | - | - | - | 2 |
| MTAP         | 0  | 17 | 5  | 0,169 | - | - | - | 2 |
| TTC33        | 0  | 17 | 5  | 0,169 | - | - | - | 2 |
| COL7A1       | 7  | 33 | 20 | 0,17  | - | - | - | 2 |
| MUC5B        | 7  | 28 | 10 | 0,174 | - | - | - | 2 |
| APC          | 2  | 12 | 9  | 0,18  | - | - | - | 2 |
| EGFLAM       | 0  | 17 | 20 | 0,194 | - | - | - | 3 |
| SKP2         | 0  | 17 | 20 | 0,194 | - | - | - | 3 |
| DAB2         | 0  | 17 | 20 | 0,194 | - | - | - | 3 |
| TTC23L       | 0  | 17 | 20 | 0,194 | - | - | - | 3 |
| PTGER4       | 0  | 17 | 20 | 0,194 | - | - | - | 3 |
| SYNE2        | 20 | 11 | 35 | 0,205 | - | - | - | 3 |
| NEB          | 7  | 28 | 30 | 0,215 | - | - | - | 3 |
| ANK2         | 7  | 28 | 30 | 0,215 | - | - | - | 3 |
| RET          | 0  | 4  | 7  | 0,239 | - | - | - | 3 |
| HLA-DQA1     | 13 | 6  | 0  | 0,24  | - | - | - | 1 |
| HCG23        | 13 | 6  | 0  | 0,24  | - | - | - | 1 |
| GAS2L2       | 13 | 6  | 0  | 0,24  | - | - | - | 1 |
| HLA-DRB1     | 13 | 6  | 0  | 0,24  | - | - | - | 1 |
| HLA-DRA      | 13 | 6  | 0  | 0,24  | - | - | - | 1 |
| HLA-DRB6     | 13 | 6  | 0  | 0,24  | - | - | - | 1 |
| HLA-DRB5     | 13 | 6  | 0  | 0,24  | - | - | - | 1 |
| BTNL2        | 13 | 6  | 0  | 0,24  | - | - | - | 1 |
| MARK1        | 13 | 0  | 5  | 0,253 | - | - | - | 1 |
| MMP28        | 13 | 0  | 5  | 0,253 | - | - | - | 1 |
| TRIB1        | 13 | 0  | 5  | 0,253 | - | - | - | 1 |
| PLPPR4       | 0  | 17 | 15 | 0,26  | - | - | - | 2 |
| SNORD72      | 0  | 17 | 15 | 0,26  | - | - | - | 2 |
| MAP1A        | 13 | 11 | 0  | 0,262 | - | - | - | 1 |
| CDKN2A       | 7  | 12 | 17 | 0,295 | - | - | - | 3 |
| NOTCH1/2/3/4 | 13 | 26 | 24 | 0,3   | - | - | - | 2 |
| PIK3CA       | 7  | 15 | 7  | 0,306 | - | - | - | 2 |
| FAT3         | 20 | 39 | 20 | 0,336 | - | - | - | 2 |
| PDGFRA       | 2  | 4  | 9  | 0,354 | - | - | - | 3 |
| USH2A        | 27 | 44 | 50 | 0,364 | - | - | - | 3 |
| ASPM         | 20 | 28 | 10 | 0,373 | - | - | - | 1 |
| CACNA1C      | 20 | 17 | 5  | 0,374 | - | - | - | 1 |
| MAGEA4       | 13 | 6  | 20 | 0,422 | - | - | - | 3 |
| NIPBL        | 13 | 17 | 30 | 0,422 | - | - | - | 3 |
| FBN2         | 13 | 22 | 30 | 0,506 | - | - | - | 3 |
| VCAN         | 13 | 22 | 30 | 0,506 | - | - | - | 3 |
| RYR3         | 13 | 22 | 30 | 0,506 | - | - | - | 3 |
| UBAP2L       | 13 | 22 | 10 | 0,561 | - | - | - | 2 |

|        |    |    |    |       |   |   |   |     |
|--------|----|----|----|-------|---|---|---|-----|
| ADGRV1 | 20 | 22 | 10 | 0,566 | - | - | - | 2   |
| MCCC2  | 13 | 6  | 5  | 0,604 | - | - | - | 1   |
| MUC6   | 13 | 6  | 5  | 0,604 | - | - | - | 1   |
| TSBP1  | 13 | 6  | 5  | 0,604 | - | - | - | 1   |
| SCAF4  | 13 | 6  | 5  | 0,604 | - | - | - | 1   |
| KMT2C  | 9  | 11 | 15 | 0,629 | - | - | - | 3   |
| PSKH2  | 9  | 11 | 15 | 0,629 | - | - | - | 3   |
| PCLO   | 20 | 11 | 11 | 0,653 | - | - | - | 1   |
| FLNC   | 13 | 17 | 25 | 0,654 | - | - | - | 3   |
| DOCK11 | 13 | 11 | 5  | 0,675 | - | - | - | 1   |
| DMD    | 20 | 33 | 30 | 0,683 | - | - | - | 2   |
| SMAD4  | 4  | 6  | 9  | 0,71  | - | - | - | 3   |
| TRPM6  | 13 | 6  | 10 | 0,744 | - | - | - | 1   |
| MAP2K1 | 4  | 2  | 2  | 0,753 | - | - | - | 1   |
| CSMD3  | 40 | 50 | 50 | 0,806 | - | - | - | 2,3 |
| CTNNB1 | 7  | 6  | 4  | 0,874 | - | - | - | 1   |
| MYC    | 7  | 9  | 9  | 0,925 | - | - | - | 2,3 |
| NAV3   | 13 | 17 | 15 | 0,965 | - | - | - | 2   |

**Table S3.** Descriptions of detected BRAF structural variants in cBioPortal.

| Event type | N of patients with the event | Event info                | Significance                              |
|------------|------------------------------|---------------------------|-------------------------------------------|
| Fusion     | 2                            | PJA2-BRAF fusion          | Likely oncogenic, likely gain-of-function |
| Fusion     | 1                            | AGK-BRAF fusion           | Oncogenic, gain-of-function               |
| Fusion     | 1                            | BRAF-SND1 fusion          | Oncogenic, gain-of-function               |
| Fusion     | 1                            | AGAP3-BRAF fusion         | Likely oncogenic, likely gain-of-function |
| Fusion     | 1                            | BRAF-TRIM24 fusion        | Likely oncogenic, gain-of-function        |
| Fusion     | 1                            | BRAF-ZC3HAV1 fusion       | Likely oncogenic, likely gain-of-function |
| Fusion     | 1*                           | BRAF-LRRC16A fusion       | Likely oncogenic, likely gain-of-function |
| Deletion   | 1*                           | BRAF deletion, intragenic | Unknow oncogenic and biological effects   |
| Deletion   | 1                            | BRAF deletion, intragenic | Unknow oncogenic and biological effects   |

\* These events occurred in the same patients.
